# Supplementary material for: Characterization and Exploration of the Neuroprotective Potential of Oat-Protein-Derived Peptides in PC12 Cells and Scopolamine-Treated Zebrafish
Source: MDPI journal article supplement (doi:10.3390/nu16010117), 2023-12-29
Supplement: s1 [file s1]

## Supplementary Materials

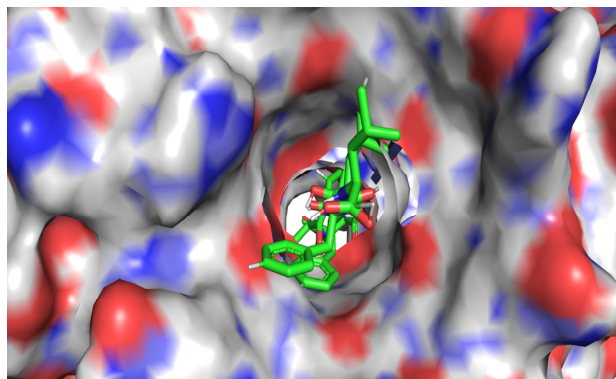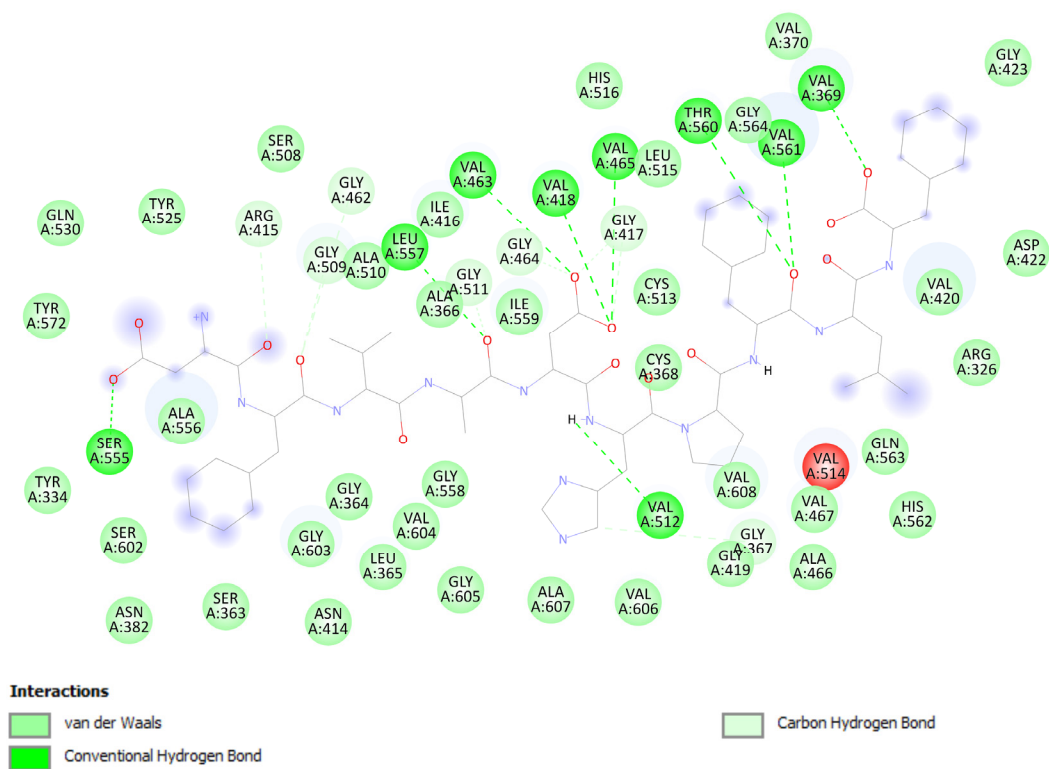

(DFVADHPFLF)

Supplementary Figure S1A

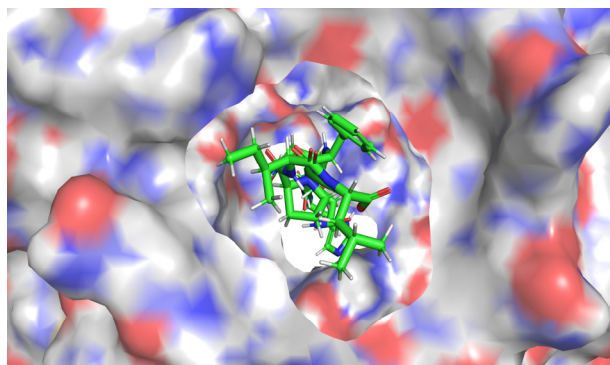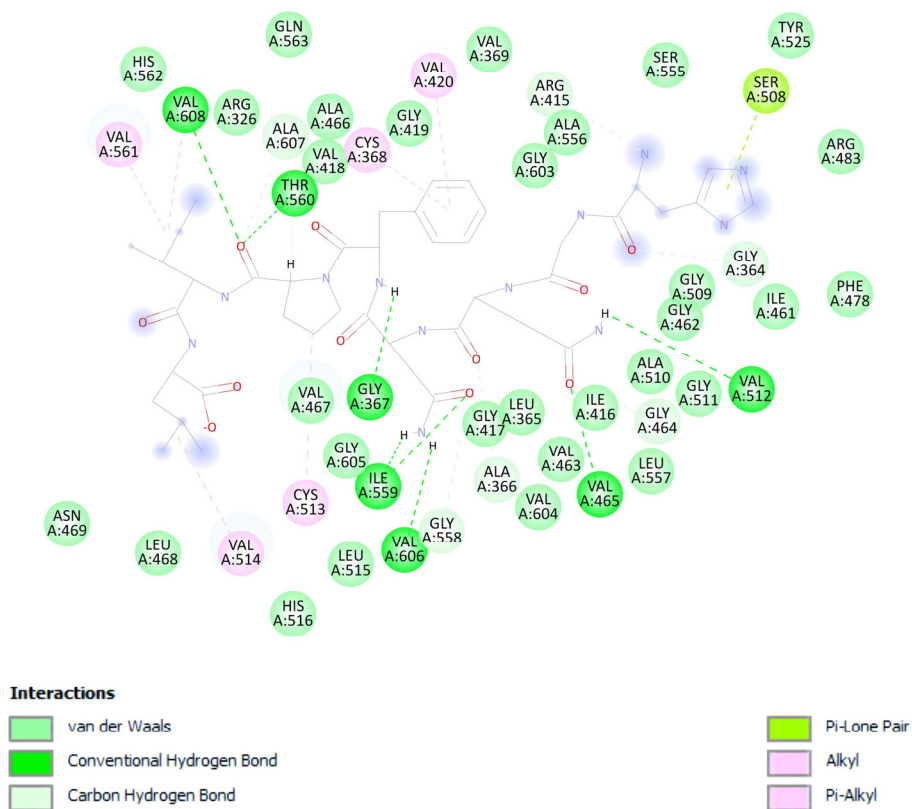

(HGQNFPII)

Supplementary Figure S1B

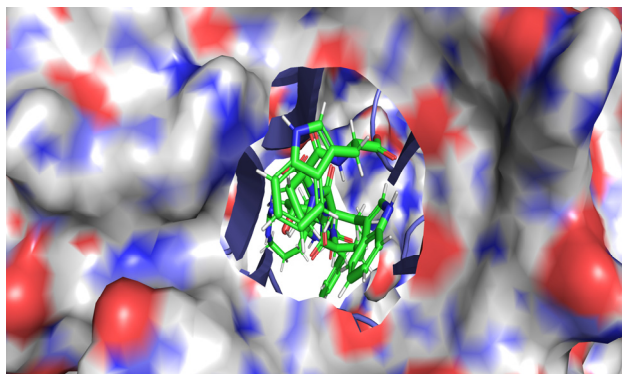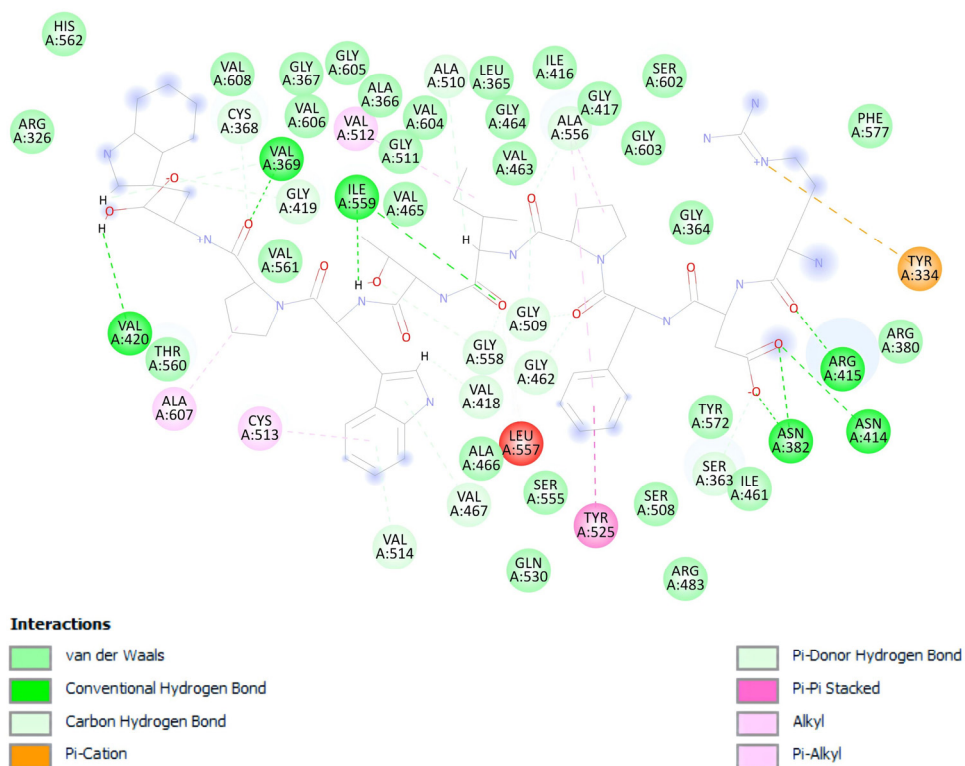

(RDFPITWPW)

Supplementary Figure S1C

**Supplementary Figure S1.** Molecular-docking interaction of peptides with Keap1. (A) DFVADHPFLF interaction with Keap1; (B) HGQNFPIL interaction with Keap1; (C) RDFPITWPW interaction with Keap1

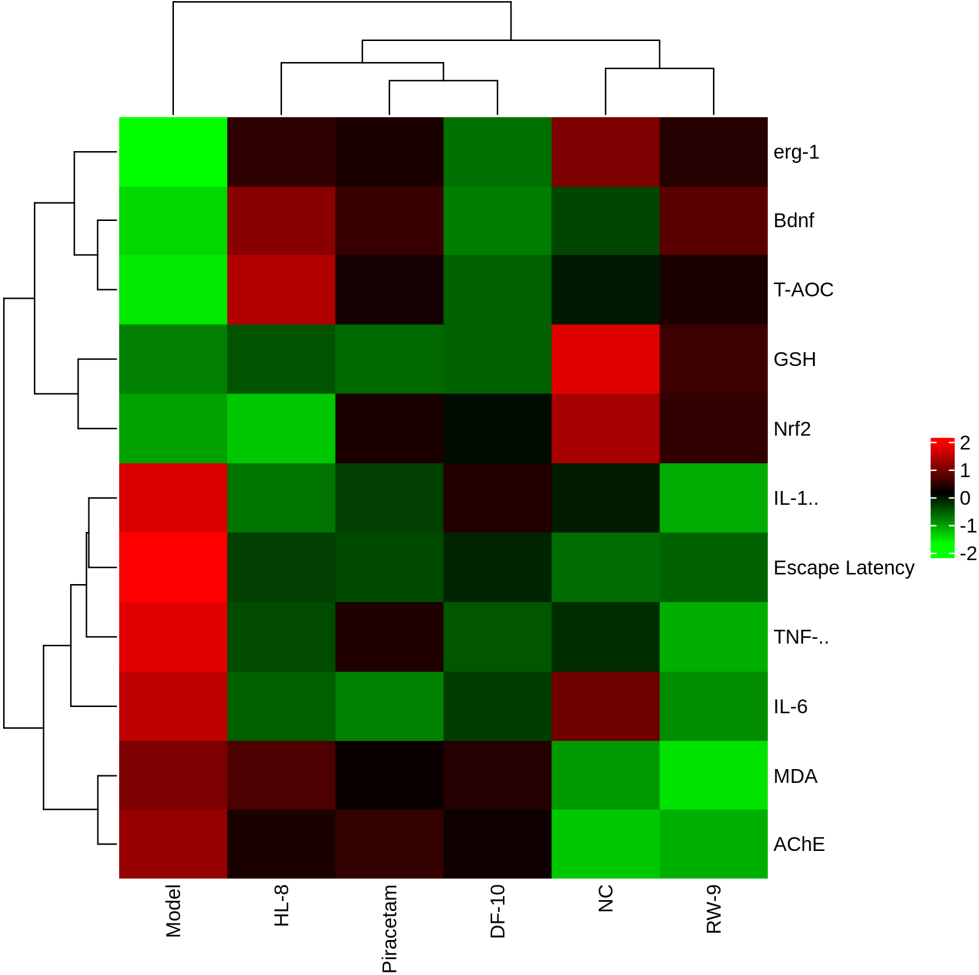

**Supplementary Figure S2.** Heatmap showing the results of a correlation analysis of samples and biochemical parameters

**Supplementary Table S1.** Primer sequences for RT-qPCR analysis

|                | <b>forward primers</b>              | <b>reverse primers</b>            |
|----------------|-------------------------------------|-----------------------------------|
| Nrf2           | 5-TCCTCTGCTGCCATTAGTC-3             | 5-TGCCTTCAGTGTGCTTCT-3            |
| Keap1          | 5-CTCAACCGCTTGCTGTAT                | 5-TAATCATCCGCCACTCATTC            |
| HO-1           | 5-GGTGACAGAAGAGGCTAA-3              | 5-GCAGAGGTAGTATCTTGAAC-3          |
| $\beta$ -actin | 5-CTATCGGCAATGAGCGGTTCC-3           | 5-TGTGTTGGCATAGAGGTCTTTACG-3      |
| Nrf2a          | 5'-ATG TCT AAA ATG CAG CCA AGC C-3' | 5'-CGG TAG CTG AAG TCG AAC AC-3'  |
| Bdnf           | 5'-GCT CTC TCA ATG CGC ACT AC-3'    | 5'-TGA CTG AGC GGA TCC TTT GG-3'  |
| Egr1           | 5'-AGT TTG ATC ACC TTG CTG GAG-3'   | 5'-AAC GGC CTG TGT AAG ATA TGG-3' |
| GAPDH          | 5'-CCTTGTGAGCGCAGTAACTCT-3'         | 5'-TCCTTGTGGGGTCAGTCCTT-3'        |

**Supplementary Table S2:** Characteristics of peptides isolated from OPH and identified by LC-MS/MS

| No# | Sequence          | Length | Mass (Da) | Identification Score | Peak Intensity |
|-----|-------------------|--------|-----------|----------------------|----------------|
| 1   | AAGRVPGYGVLT      | 12     | 1159.635  | 55.112               | 171060000      |
| 2   | ADHPFLFL          | 8      | 958.49125 | 54.525               | 39672000       |
| 3   | AFRVPTVDVS        | 10     | 1089.5819 | 83.265               | 709910000      |
| 4   | AGNNKREQQFGQ      | 12     | 1375.6593 | 135.43               | 30967000       |
| 5   | AGNNKREQQFGQN     | 13     | 1489.7022 | 70.056               | 49507000       |
| 6   | AGNNKREQQSGNNIF   | 15     | 1675.8026 | 110.08               | 71879000       |
| 7   | AILSPFWNINAH      | 12     | 1381.7143 | 136.16               | 92805000       |
| 8   | AIRGVYDGSLF       | 11     | 1196.619  | 68.224               | 110230000      |
| 9   | AKIINDNFGIV       | 11     | 1202.6659 | 64.42                | 954490000      |
| 10  | AKVINDKF          | 8      | 933.52837 | 92.187               | 193970000      |
| 11  | AKVINDKFGIVEGL    | 14     | 1501.8504 | 72.096               | 123260000      |
| 12  | ALPGGGVR          | 8      | 725.41842 | 83.287               | 165870000      |
| 13  | ANQLEPRQK         | 9      | 1082.5833 | 98.997               | 10113000       |
| 14  | ANQLEPRQKEFLLA    | 14     | 1655.8995 | 94.584               | 0              |
| 15  | APLAKVIN          | 8      | 824.51199 | 71.949               | 4020500000     |
| 16  | APSKDAPMF         | 9      | 962.45315 | 69.198               | 455300000      |
| 17  | APSKDAPMFVM       | 11     | 1192.5621 | 76.827               | 1559200000     |
| 18  | APSKDAPMFVV       | 11     | 1160.59   | 78.149               | 1584500000     |
| 19  | APSKDAPMFVV       | 12     | 1217.6114 | 77.677               | 530090000      |
| 20  | AQIPEQVR          | 8      | 939.51378 | 67.344               | 885900000      |
| 21  | AQRDFARILPTR      | 13     | 1539.8634 | 84.753               | 99999000       |
| 22  | ARKNIENPQHADTY    | 14     | 1655.8016 | 48.532               | 20075000       |
| 23  | ARQNIENPKRA       | 11     | 1295.7058 | 150.61               | 32758000       |
| 24  | ARQNIENPKRADTYNPR | 17     | 2042.0406 | 164.01               | 31469000       |
| 25  | ATRVNLYQNAILSPF   | 15     | 1705.9152 | 118.77               | 321850000      |
| 26  | ATRVNLYQNAILSPY   | 15     | 1721.9101 | 93.839               | 74876000       |
| 27  | AVEHELGGF         | 9      | 957.4556  | 73.039               | 224420000      |
| 28  | AVEHELGGFL        | 10     | 1070.5397 | 69.176               | 2562900000     |
| 29  | AVGKVLPLVN        | 10     | 1008.6332 | 74.127               | 807970000      |
| 30  | AVGKVLPLVNGK      | 12     | 1193.7496 | 80.676               | 28874000       |
| 31  | AVNLIPFPR         | 9      | 1025.6022 | 148.07               | 357550000      |

|    |                     |    |           |        |             |
|----|---------------------|----|-----------|--------|-------------|
| 32 | AVNLIPFRLH          | 11 | 1275.7452 | 124.08 | 368330000   |
| 33 | AVPFLRSQILRQ        | 12 | 1426.8409 | 109.15 | 443260000   |
| 34 | AVQGELGGFL          | 10 | 989.5182  | 62.717 | 121890000   |
| 35 | AYQPIQSQ            | 8  | 933.4556  | 135.87 | 1491500000  |
| 36 | DFARILPTR           | 10 | 1184.6666 | 138.08 | 354260000   |
| 37 | DFGWGRPVM           | 10 | 1210.5593 | 62.546 | 44557000    |
| 38 | DFVADHPFLF          | 10 | 1206.571  | 67.169 | 1587200000  |
| 39 | DFVADHPFLFL         | 11 | 1319.655  | 73.248 | 618680000   |
| 40 | DHHDRFMPF           | 9  | 1200.5135 | 125.58 | 444130000   |
| 41 | DILRRGQLL           | 9  | 1082.656  | 111.04 | 154340000   |
| 42 | DMSTPEFPSGR         | 11 | 1222.5288 | 81.972 | 47693000    |
| 43 | DQNGDGIYPW          | 11 | 1276.5724 | 75.825 | 261780000   |
| 44 | DRLRQGQLL           | 9  | 1097.6305 | 86.794 | 304890000   |
| 45 | DTEGPPFMAR          | 10 | 1119.5019 | 139.68 | 490650000   |
| 46 | DTEGRFMPVNFENIFSK   | 17 | 2029.9568 | 126.56 | 555030000   |
| 47 | DTYNPRAGRIT         | 11 | 1262.6367 | 83.397 | 133980000   |
| 48 | DWYKGPTL            | 8  | 978.48108 | 77.741 | 71967000    |
| 49 | DWYKGPTLL           | 9  | 1091.5651 | 75.692 | 2178700000  |
| 50 | DWYKGPTLLE          | 10 | 1220.6077 | 73.573 | 79996000    |
| 51 | EDVSGVVL            | 8  | 816.4229  | 72.355 | 175770000   |
| 52 | EHELGGFLGL          | 10 | 1070.5397 | 71.296 | 2562900000  |
| 53 | EQYQPYPEQQQPFLQ     | 15 | 1921.8846 | 73.632 | 4308600000  |
| 54 | EQYQPYPEQQQPIL      | 14 | 1759.8417 | 61.213 | 443160000   |
| 55 | EQYQPYPEQQQPILQQ    | 16 | 2015.9589 | 84.884 | 188850000   |
| 56 | ESHVADRIGYY         | 11 | 1308.6099 | 136.21 | 134050000   |
| 57 | EVPFLRSQIL          | 10 | 1200.6867 | 90.37  | 208740000   |
| 58 | FAGDDAPRAVFPS       | 13 | 1348.6412 | 88.596 | 59965000    |
| 59 | FDPSEQYQPYPEQQQPF   | 17 | 2126.9222 | 45.911 | 42177000    |
| 60 | FDPSEQYQPYPEQQQPFLQ | 19 | 2368.0648 | 53.034 | 57755000    |
| 61 | FDQNGDGIYPW         | 12 | 1423.6408 | 72.607 | 336380000   |
| 62 | FFDQNGDGIYPW        | 13 | 1570.7092 | 60.019 | 471750000   |
| 63 | FIDNIFRF            | 8  | 1070.5549 | 90.986 | 53257000    |
| 64 | FIGRRSRPDQIGGL      | 14 | 1570.8692 | 123.42 | 2457900000  |
| 65 | FLKPIVSQ            | 8  | 930.55385 | 79.469 | 12889000000 |
| 66 | FNDILRRG            | 8  | 989.54066 | 80.098 | 129180000   |
| 67 | FNDILRRGQLL         | 11 | 1343.7674 | 152.11 | 1170500000  |
| 68 | FNDRLRQGQLL         | 11 | 1358.7419 | 120.12 | 399770000   |
| 69 | FNPDKSPAYPIRF       | 13 | 1550.7882 | 133.99 | 1791200000  |
| 70 | FPGIADRM            | 8  | 905.44292 | 107.32 | 248070000   |
| 71 | FRVPTVDVS           | 9  | 1018.5447 | 65.252 | 422430000   |
| 72 | FRVPTVDVSV          | 10 | 1117.6132 | 86.67  | 71537000    |
| 73 | FSLAPLVPRL          | 10 | 1111.6754 | 136.11 | 51651000    |
| 74 | FSYRDNPRDIQLN       | 13 | 1636.7958 | 162.38 | 390060000   |

|     |                     |    |           |        |            |
|-----|---------------------|----|-----------|--------|------------|
| 75  | FVADHPFLFL          | 10 | 1204.6281 | 64.236 | 311180000  |
| 76  | GAELIDSVLDVVRK      | 14 | 1512.8512 | 133.89 | 249340000  |
| 77  | GAPSAPIEKL          | 10 | 981.5495  | 60.91  | 224520000  |
| 78  | GDGIYPWETFRGL       | 14 | 1622.8093 | 53.08  | 47366000   |
| 79  | GFAGDDAPRAVFPS      | 14 | 1405.6626 | 91.313 | 134650000  |
| 80  | GFDTEGPPFMAR        | 12 | 1323.5918 | 161.79 | 627680000  |
| 81  | GIGTVPVGR           | 9  | 854.4974  | 128.57 | 512560000  |
| 82  | GIGTVPVGRVE         | 11 | 1082.6084 | 113.62 | 3319000000 |
| 83  | GIGTVPVGRVETG       | 13 | 1240.6776 | 112.75 | 1322200000 |
| 84  | GIGTVPVGRVETGVKPG   | 18 | 1734.9992 | 110.9  | 1488200000 |
| 85  | GISQQAQRIQ          | 11 | 1198.6418 | 72.968 | 762730000  |
| 86  | GIVHWGYNDGDAPVVAIY  | 18 | 1944.937  | 87.667 | 196580000  |
| 87  | GLIGKRLKIA          | 10 | 1067.7179 | 96.285 | 220400000  |
| 88  | GLPSRPLY            | 8  | 901.50215 | 82.263 | 644990000  |
| 89  | GLQFLKPIVSQ         | 11 | 1228.718  | 95.358 | 361090000  |
| 90  | GLQKGEIGKR          | 10 | 1084.6353 | 113.41 | 34046000   |
| 91  | GLQKGEIGKRL         | 11 | 1197.7194 | 187.78 | 408230000  |
| 92  | GLQKGEIGKRLL        | 12 | 1310.8034 | 176.6  | 121850000  |
| 93  | GLQKGEIGKRLLR       | 13 | 1466.9045 | 97.214 | 647510000  |
| 94  | GLQKGEIGKRLLRAK     | 15 | 1666.0366 | 191.04 | 420240000  |
| 95  | GLSYPTLPTWRPS       | 13 | 1473.7616 | 123.79 | 112610000  |
| 96  | GNNKEDQQFGQ         | 11 | 1263.548  | 147.36 | 63616000   |
| 97  | GNNKEDQQFGQN        | 12 | 1377.5909 | 111.06 | 105050000  |
| 98  | GNNKEDQQFGQNIFSGF   | 17 | 1928.8653 | 150.46 | 57190000   |
| 99  | GNNKREQQF           | 9  | 1119.5421 | 65.246 | 7141500    |
| 100 | GNNKREQQFGQ         | 11 | 1304.6222 | 121.8  | 243610000  |
| 101 | GNNKREQQFGQN        | 12 | 1418.6651 | 153.97 | 401110000  |
| 102 | GNNKREQQFGQNIF      | 14 | 1678.8176 | 96.009 | 140300000  |
| 103 | GNNKREQQFGQNIFSGF   | 17 | 1969.9395 | 157.99 | 490240000  |
| 104 | GNNKREQQSGNNIF      | 14 | 1604.7655 | 152.67 | 1587800000 |
| 105 | GQGEQDRFVLK         | 11 | 1275.6571 | 115.06 | 67830000   |
| 106 | GQTVFNDILRR         | 11 | 1317.7153 | 155.42 | 299860000  |
| 107 | GQTVFNDILRRGQLL     | 15 | 1728.9635 | 163.12 | 4628900000 |
| 108 | GQTVFNDILRRGQLLIIPQ | 19 | 2180.243  | 189.61 | 297110000  |
| 109 | GQTVFNDRLRQGQLL     | 15 | 1743.938  | 141.08 | 249490000  |
| 110 | GRVPGYGVLT          | 10 | 1017.5607 | 86.794 | 326450000  |
| 111 | GVEPVIGVR           | 9  | 924.53927 | 107.67 | 385210000  |
| 112 | GVFTDKDKAAAH        | 12 | 1258.6306 | 68.069 | 98451000   |
| 113 | GVNEKEYTSDITIV      | 14 | 1566.7777 | 113.1  | 48961000   |
| 114 | GVRNPEEIPWA         | 11 | 1266.6357 | 83.313 | 134470000  |
| 115 | GVRNPEEIPWAE        | 12 | 1395.6783 | 124.74 | 836720000  |
| 116 | GVRNPEEIPWAEA       | 13 | 1466.7154 | 90.149 | 336120000  |
| 117 | GVRNPEEIPWAEAG      | 14 | 1523.7369 | 78.488 | 1174000000 |



|     |                    |    |           |        |            |
|-----|--------------------|----|-----------|--------|------------|
| 118 | GWVANKGEWILL       | 12 | 1384.7503 | 95.909 | 123070000  |
| 119 | HGQNFPIIL          | 8  | 924.48175 | 52.693 | 1481800000 |
| 120 | HIKQGDVV           | 8  | 894.49232 | 75.269 | 102500000  |
| 121 | HLKDEHQRVH         | 10 | 1297.664  | 116.25 | 25354000   |
| 122 | HNAPGLVY           | 8  | 869.43955 | 74.717 | 299080000  |
| 123 | HQAYQPIQSQ         | 10 | 1198.5731 | 123.98 | 654110000  |
| 124 | HVSFFDQN           | 8  | 992.43519 | 69.432 | 182210000  |
| 125 | HVSFFDQNGDGIIYPW   | 16 | 1893.8686 | 227.94 | 271470000  |
| 126 | HWGYNDGDAPVVA      | 13 | 1399.6157 | 134.77 | 52234000   |
| 127 | IDAPGHRDFIKN       | 12 | 1381.7102 | 105.4  | 75842000   |
| 128 | IDFVADHPFLF        | 11 | 1319.655  | 110.67 | 2227300000 |
| 129 | IDFVADHPFLFL       | 12 | 1432.7391 | 88.819 | 439900000  |
| 130 | IDSVLDVVRK         | 10 | 1142.6659 | 154.12 | 141740000  |
| 131 | IENPKRAD           | 8  | 941.49304 | 102.72 | 8167000    |
| 132 | IENPKRADTY         | 10 | 1205.6041 | 132.76 | 107990000  |
| 133 | IENPKRADTYNPR      | 13 | 1572.8009 | 177.83 | 1520400000 |
| 134 | IENPKRADTYNPRAGRIT | 18 | 2071.0923 | 89.846 | 1017000000 |
| 135 | IENPQHADTYNPR      | 13 | 1553.7223 | 175.15 | 162470000  |
| 136 | ILRALPVDVL         | 10 | 1107.7016 | 91.626 | 97506000   |
| 137 | IQRELGGFF          | 9  | 1065.5607 | 123.98 | 667800000  |
| 138 | IREDVSGVVL         | 10 | 1085.6081 | 110.41 | 1579600000 |
| 139 | IRRVIEPQ           | 8  | 1009.6033 | 126.28 | 340550000  |
| 140 | IVRDIKEKL          | 9  | 1112.6917 | 120.87 | 306800000  |
| 141 | KAERERGITIDIA      | 13 | 1470.8154 | 108.3  | 153200000  |
| 142 | KDEHQRVH           | 8  | 1047.521  | 150.88 | 155970000  |
| 143 | KDFPLTWPW          | 9  | 1188.5968 | 68.383 | 131770000  |
| 144 | KDIPITWPW          | 9  | 1154.6124 | 84.568 | 2892200000 |
| 145 | KDLLPVGGDFLL       | 12 | 1285.7282 | 92.538 | 191180000  |
| 146 | KEDQQFGQNIFSGF     | 14 | 1643.758  | 112.11 | 42243000   |
| 147 | KEQRGEII           | 8  | 971.53999 | 106.94 | 1540800000 |
| 148 | KEQRGEIIR          | 9  | 1127.6411 | 88.136 | 96560000   |
| 149 | KEQRGEIIRVT        | 11 | 1327.7572 | 103.34 | 462320000  |
| 150 | KFIPELIGK          | 9  | 1043.6379 | 120.87 | 1047600000 |
| 151 | KHGSDTATF          | 9  | 962.44576 | 67.981 | 900380     |
| 152 | KIINDNFGIV         | 10 | 1131.6288 | 71.491 | 114110000  |
| 153 | KIINDNFGIVE        | 11 | 1260.6714 | 117.81 | 495850000  |
| 154 | KLPYHQGGDKRKF      | 13 | 1572.8525 | 119.6  | 990910000  |
| 155 | KNIENPQHADTY       | 12 | 1428.6634 | 133.76 | 32752000   |
| 156 | KNIENPQHADTYNPR    | 15 | 1795.8602 | 160.46 | 193490000  |
| 157 | KNNRGEEF           | 8  | 992.46756 | 75.243 | 27107000   |
| 158 | KNNRGEEFDAF        | 11 | 1325.6    | 111.06 | 425110000  |
| 159 | KNNRGEEFGAF        | 11 | 1267.5945 | 120.31 | 849000000  |
| 160 | KNNRGQESGVFTPK     | 14 | 1560.8009 | 169.58 | 922690000  |

|     |                  |    |           |        |            |
|-----|------------------|----|-----------|--------|------------|
| 161 | KQGDVIALPA       | 10 | 1010.576  | 65.156 | 661750000  |
| 162 | KQGDVVAL         | 8  | 828.47052 | 51.787 | 0          |
| 163 | KQGDVVALPA       | 10 | 996.5604  | 98.904 | 155550000  |
| 164 | KREQQSGNNIF      | 11 | 1319.6582 | 78.516 | 47510000   |
| 165 | KSYELPDGQVITI    | 13 | 1461.7715 | 85.807 | 195270000  |
| 166 | KSYELPDGQVITIG   | 14 | 1518.793  | 72.096 | 916930000  |
| 167 | KTRENMFHL        | 9  | 1174.5917 | 77.282 | 176860000  |
| 168 | KVVEDNLGKIK      | 11 | 1241.7343 | 148.73 | 180210000  |
| 169 | LENVTEEDAKATNL   | 14 | 1545.7522 | 51.268 | 37736000   |
| 170 | LFPVYIDR         | 8  | 1021.5597 | 79.469 | 219520000  |
| 171 | LIDSVLDVVRK      | 11 | 1255.75   | 87.258 | 175270000  |
| 172 | LIEDVLPQ         | 8  | 925.51205 | 98.415 | 136380000  |
| 173 | LIPFPR LH        | 8  | 991.59672 | 77.72  | 149570000  |
| 174 | LKDEHQ RVH       | 9  | 1160.6051 | 70.919 | 15086000   |
| 175 | LLFPVYIDR        | 9  | 1134.6437 | 160.75 | 325280000  |
| 176 | LLFPVYIDRIHKA    | 13 | 1583.9188 | 56.087 | 20712000   |
| 177 | LQFLKPIV         | 8  | 956.60589 | 75.915 | 199840000  |
| 178 | LQFLKPIVSQ       | 10 | 1171.6965 | 104.01 | 5554100000 |
| 179 | LRALPIDV         | 8  | 895.5491  | 62.714 | 42039000   |
| 180 | LRALPIDVL        | 9  | 1008.6332 | 116.54 | 321390000  |
| 181 | LRALPVDVL        | 9  | 994.61752 | 104.45 | 1072900000 |
| 182 | LRALPVDVLAN      | 11 | 1179.6976 | 85.67  | 0          |
| 183 | LRSQILRQ         | 8  | 1012.6142 | 99.755 | 105750000  |
| 184 | LSAISPNSMVSH     | 12 | 1241.6074 | 40.002 | 0          |
| 185 | LSRGLIDL         | 8  | 885.52837 | 67.032 | 41969000   |
| 186 | LSRGLIDLN        | 9  | 999.57129 | 61.962 | 273040000  |
| 187 | LSYPTLPTWRPS     | 12 | 1416.7402 | 74.944 | 72061000   |
| 188 | LVPYPRIH         | 8  | 993.57599 | 91.093 | 73722000   |
| 189 | MIQGHARVQ        | 9  | 1038.5393 | 102.71 | 21503000   |
| 190 | MQQQFFQPQ        | 9  | 1180.5335 | 83.614 | 72382000   |
| 191 | MRDFPITWPW       | 10 | 1347.6434 | 127.56 | 2049700000 |
| 192 | MTPQSPKPS        | 9  | 971.47462 | 83.265 | 8648300    |
| 193 | MVPFLRSQ         | 8  | 976.51642 | 78.178 | 313480000  |
| 194 | MVPFLRSQIL       | 10 | 1202.6845 | 80.229 | 471050000  |
| 195 | MVPFLRSQILRQ     | 12 | 1486.8442 | 56.205 | 69277000   |
| 196 | NARSQPKL         | 9  | 1027.5411 | 106.38 | 18302000   |
| 197 | NARSQPKLTLREIWMM | 17 | 2088.0608 | 87.388 | 92527000   |
| 198 | NDILRRGQLL       | 10 | 1196.699  | 171.53 | 6036800000 |
| 199 | NDILRRGQLLIIPQ   | 14 | 1647.9784 | 142.08 | 62056000   |
| 200 | NDILRRGQLLIVPQ   | 14 | 1633.9628 | 72.891 | 33019000   |
| 201 | NDQRGEII         | 8  | 943.47231 | 121.67 | 1618100000 |
| 202 | NDQRGEIIR        | 9  | 1099.5734 | 147.24 | 143030000  |
| 203 | NDQRGEIIRV       | 10 | 1198.6418 | 88.392 | 140770000  |

|     |                     |    |           |        |             |
|-----|---------------------|----|-----------|--------|-------------|
| 204 | NDQRGEIIRVS         | 11 | 1285.6739 | 119.45 | 1707200000  |
| 205 | NDRLRQGQL           | 9  | 1098.5894 | 93.429 | 176230000   |
| 206 | NDRLRQGQLL          | 10 | 1211.6735 | 136.21 | 31666000000 |
| 207 | NDRLRQGQLLI         | 11 | 1324.7575 | 89.886 | 162060000   |
| 208 | NDRLRQGQLLIVPQ      | 14 | 1648.9373 | 157.25 | 147420000   |
| 209 | NFENIFSK            | 8  | 997.4869  | 78.324 | 371370000   |
| 210 | NFPILNLVQM          | 10 | 1187.6373 | 71.296 | 742300000   |
| 211 | NFPILNLVQMS         | 11 | 1274.6693 | 58.119 | 267740000   |
| 212 | NHGQTVFNDILRRGQLL   | 17 | 1980.0653 | 263.57 | 651490000   |
| 213 | NHPGQIGNGY          | 10 | 1055.4785 | 111.65 | 426900000   |
| 214 | NIENPKRA            | 8  | 940.50903 | 80.462 | 33477000    |
| 215 | NIENPKRAD           | 9  | 1055.536  | 73.26  | 3394100     |
| 216 | NIENPKRADTY         | 11 | 1319.647  | 121.64 | 45682000    |
| 217 | NIENPKRADTYNPR      | 14 | 1686.8438 | 208.63 | 613610000   |
| 218 | NIENPKRADTYNPRAGRIT | 19 | 2185.1352 | 93.753 | 262400000   |
| 219 | NKEDQQFGQ           | 9  | 1092.4836 | 125.5  | 7584400     |
| 220 | NKEDQQFGQN          | 10 | 1206.5265 | 102    | 15698000    |
| 221 | NKGEWILL            | 8  | 971.54402 | 108.98 | 2055800000  |
| 222 | NKREQQFGQ           | 9  | 1133.5578 | 101.43 | 14641000    |
| 223 | NKREQQFGQN          | 10 | 1247.6007 | 70.256 | 39615000    |
| 224 | NKREQQFGQNIFSGF     | 15 | 1798.8751 | 100.69 | 48695000    |
| 225 | NKREQQSGNNIF        | 12 | 1433.7011 | 122.96 | 205000000   |
| 226 | NKTPGQVL            | 8  | 855.48142 | 58.167 | 373940000   |
| 227 | NKTPGQVLIK          | 10 | 1096.6604 | 86.136 | 144250000   |
| 228 | NLDLVVPR            | 8  | 924.53927 | 107.43 | 88697000    |
| 229 | NLDWYKGPTLL         | 11 | 1318.6921 | 85.716 | 1582300000  |
| 230 | NLIPFPRL            | 8  | 968.58074 | 77.496 | 34329000    |
| 231 | NLIPFPRLH           | 9  | 1105.6396 | 97.071 | 367550000   |
| 232 | NLKDEHQRVH          | 10 | 1274.648  | 149.82 | 516700000   |
| 233 | NLKNNRGEFGAF        | 13 | 1494.7215 | 91.656 | 147950000   |
| 234 | NLKNNRGQESGVF       | 13 | 1461.7324 | 78.61  | 58722000    |
| 235 | NLKNNRGQESGVFTPK    | 16 | 1787.9278 | 53.3   | 66241000    |
| 236 | NLPSRSDVVQLY        | 12 | 1389.7252 | 76.345 | 42725000    |
| 237 | NNANQLEPR           | 9  | 1054.5156 | 164.72 | 52613000    |
| 238 | NNANQLEPRQKEFLLA    | 16 | 1883.9854 | 138.51 | 97240000    |
| 239 | NNGQTVFNDILRRGQLL   | 17 | 1957.0494 | 191.29 | 437350000   |
| 240 | NNGQTVFNDRLRQGQLL   | 17 | 1972.0239 | 80.387 | 48678000    |
| 241 | NNHGQTVFNDILRRGQLL  | 18 | 2094.1083 | 48.899 | 98362000    |
| 242 | NNKREQQFGQ          | 10 | 1247.6007 | 69.825 | 3712700     |
| 243 | NPRAGRIT            | 8  | 883.4988  | 65.235 | 138260000   |
| 244 | NSKNFPILN           | 9  | 1045.5556 | 83.206 | 839760000   |
| 245 | NSKNFPILNI          | 10 | 1158.6397 | 75.043 | 99485000    |
| 246 | NSKNFPILNIV         | 11 | 1257.7081 | 106.6  | 111580000   |

|     |                      |    |           |        |            |
|-----|----------------------|----|-----------|--------|------------|
| 247 | NSKNFPILNIVQM        | 13 | 1516.8072 | 91.265 | 138310000  |
| 248 | NSKNFPTL             | 8  | 919.47633 | 71.141 | 6284000000 |
| 249 | NSKNFPTLN            | 9  | 1033.5193 | 109.01 | 4780000000 |
| 250 | NSKNFPTLNLVQM        | 13 | 1504.7708 | 103.26 | 579630000  |
| 251 | NSKNFPTLNLVQMS       | 14 | 1591.8028 | 89.171 | 184150000  |
| 252 | NWDDMEKIWHH          | 11 | 1509.6459 | 109.44 | 87357000   |
| 253 | PFMQQKQPFMQQQQ       | 14 | 1792.8389 | 45.997 | 864790000  |
| 254 | PFMQQQQPFMQQK        | 14 | 1792.8389 | 46.891 | 864790000  |
| 255 | PGGGVRLDPGKSWAL      | 15 | 1508.81   | 75.652 | 121070000  |
| 256 | PSEQYQPYEQQEPF       | 15 | 1865.8108 | 101.82 | 179420000  |
| 257 | PTLPTWRP             | 8  | 966.5287  | 134.06 | 130030000  |
| 258 | PTLPTWRPS            | 9  | 1053.5607 | 147.19 | 545530000  |
| 259 | PTLPTWRPSL           | 10 | 1166.6448 | 96.948 | 146550000  |
| 260 | QDRSFNGL             | 8  | 935.44609 | 66.429 | 103930000  |
| 261 | QELREIAG             | 8  | 914.48214 | 62.464 | 21255000   |
| 262 | QEQPFVQQ             | 8  | 1002.4771 | 99.919 | 157300000  |
| 263 | QGLIGKRL             | 8  | 883.56034 | 80.462 | 15689000   |
| 264 | QGLQFLKPF            | 9  | 1076.6019 | 65.803 | 939270000  |
| 265 | QGLQFLKPIVSQ         | 12 | 1356.7765 | 83.499 | 1277300000 |
| 266 | QGRGFTGL             | 8  | 834.4348  | 83.377 | 4885300000 |
| 267 | QGRGYTGL             | 8  | 850.42972 | 78.616 | 191330000  |
| 268 | QHVSFFDQNGDGIIYPW    | 17 | 2021.9272 | 286.95 | 67907000   |
| 269 | QKGEIGKRL            | 9  | 1027.6138 | 90.862 | 337720000  |
| 270 | QKGEIGKRLL           | 10 | 1140.6979 | 82.241 | 576190000  |
| 271 | QKGEIGKRLLR          | 11 | 1296.799  | 132.13 | 387540000  |
| 272 | QKGEIGKRLLRAK        | 13 | 1495.9311 | 144.65 | 548730000  |
| 273 | QLLQPQLQ             | 8  | 966.54983 | 81.381 | 163220000  |
| 274 | QMFLQPLL             | 8  | 988.54157 | 71.359 | 233840000  |
| 275 | QNAILSPFWNINAH       | 14 | 1623.8158 | 143.03 | 184200000  |
| 276 | QNIENPKRA            | 9  | 1068.5676 | 126.67 | 142680000  |
| 277 | QNIENPKRADTY         | 12 | 1447.7056 | 55.452 | 63571000   |
| 278 | QNIENPKRADTYNPR      | 15 | 1814.9024 | 208.46 | 750060000  |
| 279 | QNIENPKRADTYNPRAGRIT | 20 | 2313.1938 | 145.71 | 327320000  |
| 280 | QNLKDEHQRVH          | 11 | 1402.7066 | 56.359 | 7617800    |
| 281 | QQGLIGKR             | 8  | 898.53485 | 99.919 | 113340000  |
| 282 | QQGLIGKRLKIA         | 12 | 1323.8351 | 141.48 | 190650000  |
| 283 | QQPPFVQQ             | 8  | 970.48723 | 94.163 | 2705000000 |
| 284 | QQQFFQPQ             | 8  | 1049.493  | 100.82 | 786400000  |
| 285 | QQQLLPQ              | 8  | 981.52434 | 82.263 | 150270000  |
| 286 | QQQLLPQL             | 9  | 1094.6084 | 88.029 | 293910000  |
| 287 | QQQLLPQLQ            | 10 | 1222.667  | 113.89 | 122310000  |
| 288 | QQQLNPCRQFLMQQ       | 14 | 1760.845  | 122.13 | 160290000  |
| 289 | QQQMFLQPL            | 9  | 1131.5747 | 64.803 | 160630000  |

|     |                     |    |           |        |             |
|-----|---------------------|----|-----------|--------|-------------|
| 290 | QQQQFFQPQ           | 9  | 1177.5516 | 110.36 | 265710000   |
| 291 | QQQQFFQPQL          | 10 | 1290.6357 | 94.662 | 208160000   |
| 292 | QQQQFIQPQ           | 9  | 1143.5673 | 110.61 | 215870000   |
| 293 | QQQQFIQPQL          | 10 | 1256.6513 | 92.187 | 72937000    |
| 294 | QQQQVVQAQQMGLVQPQTQ | 19 | 2166.0851 | 43.544 | 144100000   |
| 295 | QQQVFQPQ            | 8  | 1001.493  | 82.263 | 366820000   |
| 296 | QQVFIPPQLQ          | 10 | 1196.6554 | 104.45 | 832420000   |
| 297 | QQVFIPPQLQQ         | 11 | 1324.7139 | 86.794 | 231120000   |
| 298 | QRELGGFF            | 8  | 952.47667 | 94.662 | 160110000   |
| 299 | QRGTSVIPK           | 9  | 984.57163 | 70.525 | 69371000    |
| 300 | QRLQFLKPT           | 9  | 1129.6608 | 126.67 | 5488000000  |
| 301 | QRLQFLKPTM          | 10 | 1260.7013 | 124.83 | 284080000   |
| 302 | QRLQFLKPTMS         | 11 | 1347.7333 | 99.442 | 73435000    |
| 303 | QRPVRDDLE           | 9  | 1126.5731 | 90.37  | 216320000   |
| 304 | QRPVRDDLEKHIPKPY    | 16 | 1990.0748 | 217.22 | 1187100000  |
| 305 | QSQDRSFN            | 8  | 980.43117 | 93.195 | 44325000    |
| 306 | QSQNDQRGEII         | 11 | 1286.6215 | 100.57 | 110170000   |
| 307 | QSSRQGGLK           | 9  | 959.51484 | 92.47  | 9672500     |
| 308 | QSSRQGGLR           | 9  | 987.52099 | 163.04 | 214840000   |
| 309 | QVFIPPQLQ           | 9  | 1068.5968 | 117.16 | 6911200000  |
| 310 | QVFIPPQLQQ          | 10 | 1196.6554 | 87.323 | 832420000   |
| 311 | QVFNQPQMQ           | 9  | 1118.5179 | 85.359 | 223850000   |
| 312 | QVFNQPQQQ           | 9  | 1115.536  | 86.872 | 354130000   |
| 313 | QVGQSPQYQE          | 10 | 1162.5255 | 75.738 | 23930000    |
| 314 | QVGQSPQYQEGQ        | 12 | 1347.6055 | 78.516 | 53847000    |
| 315 | QVQQQVFQPQ          | 10 | 1228.62   | 67.981 | 17667000    |
| 316 | QYQPYPEQQQPIL       | 13 | 1630.7991 | 68.846 | 67634000    |
| 317 | QYQPYPEQQQPILQ      | 14 | 1758.8577 | 127.76 | 273860000   |
| 318 | RADTYNPR            | 8  | 991.48354 | 154.71 | 11833000    |
| 319 | RALPIDVL            | 8  | 895.5491  | 126.24 | 18795000000 |
| 320 | RALPIDVLA           | 9  | 966.58622 | 62.659 | 697180000   |
| 321 | RALPVDVL            | 8  | 881.53345 | 128.75 | 16397000000 |
| 322 | RALPVDVLA           | 9  | 952.57057 | 73.616 | 685640000   |
| 323 | RALPVDVLAN          | 10 | 1066.6135 | 123.98 | 7929500000  |
| 324 | RAVEHELGGF          | 10 | 1113.5567 | 81.548 | 113840000   |
| 325 | RAVEHELGGFL         | 11 | 1226.6408 | 101.25 | 2647900000  |
| 326 | RAVQGELGGFL         | 11 | 1145.6193 | 72.23  | 0           |
| 327 | RDFARILPTR          | 11 | 1340.7677 | 115.7  | 9466800000  |
| 328 | RDFPITWPW           | 9  | 1216.6029 | 107.66 | 3734900000  |
| 329 | REIVRDIKEKL         | 11 | 1397.8354 | 76.85  | 103360000   |
| 330 | RELIIGDR            | 8  | 970.55598 | 169.09 | 660730000   |
| 331 | REQQFGQN            | 8  | 1005.4628 | 81.191 | 14651000    |
| 332 | RFEEIVKE            | 8  | 1048.5553 | 70.69  | 69127000    |

|     |                   |    |           |        |            |
|-----|-------------------|----|-----------|--------|------------|
| 333 | RFEIIVKEVGSY      | 12 | 1454.7405 | 101.97 | 367340000  |
| 334 | RFEIIVKEVGSYL     | 13 | 1567.8246 | 104.43 | 362690000  |
| 335 | RFKQGDVIALPA      | 12 | 1313.7456 | 75.571 | 195400000  |
| 336 | RGEFGAF           | 8  | 911.41373 | 65.777 | 60171000   |
| 337 | RGEIIRVS          | 8  | 928.54541 | 54.982 | 44955000   |
| 338 | RGEIIRVT          | 8  | 942.56106 | 83.429 | 771060000  |
| 339 | RGITIDIA          | 8  | 857.49707 | 76.847 | 606340000  |
| 340 | RGQESGVFTPK       | 11 | 1204.62   | 89.886 | 33865000   |
| 341 | RIIGLDNI          | 8  | 912.53927 | 103.29 | 1613800000 |
| 342 | RLHGQNFILNL       | 12 | 1420.7939 | 68.224 | 73648000   |
| 343 | RLKDG AHQPPEAGEVL | 16 | 1715.8955 | 106.26 | 306550000  |
| 344 | RLQFLKPT          | 8  | 1001.6022 | 128.48 | 750160000  |
| 345 | RLRQGQLL          | 8  | 982.6036  | 74.396 | 806350000  |
| 346 | RQNIENPKRA        | 10 | 1224.6687 | 77.533 | 28657000   |
| 347 | RQNIENPKRADTY     | 13 | 1603.8067 | 62.528 | 40119000   |
| 348 | RQNIENPKRADTYNPR  | 16 | 1971.0035 | 119.54 | 127020000  |
| 349 | RRSRPDQIGGL       | 11 | 1253.6953 | 79.489 | 551270000  |
| 350 | RSAPAFIELDTK      | 12 | 1346.7194 | 61.65  | 79717000   |
| 351 | RSRPDQIGGL        | 10 | 1097.5942 | 87.639 | 688860000  |
| 352 | RSTNLDWYKGPT      | 12 | 1436.7048 | 76.143 | 63573000   |
| 353 | RSTNLDWYKGPTLL    | 14 | 1662.873  | 121.61 | 1250600000 |
| 354 | RSTNLDWYKGPTLLE   | 15 | 1791.9155 | 67.252 | 67686000   |
| 355 | RTIDFVADHPFLF     | 13 | 1576.8038 | 126.31 | 389750000  |
| 356 | RVAPEDHPVLL       | 11 | 1244.6877 | 80.165 | 342270000  |
| 357 | RVAPEEHPVLL       | 11 | 1258.7034 | 87.476 | 303980000  |
| 358 | RVAPEEHPVLLT      | 12 | 1359.751  | 56.013 | 48074000   |
| 359 | RVNLYQNAILSPF     | 13 | 1533.8304 | 166.52 | 146560000  |
| 360 | RVNLYQNAILSPY     | 13 | 1549.8253 | 128.38 | 25516000   |
| 361 | RVPTVDVS          | 8  | 871.47633 | 95.793 | 3046000000 |
| 362 | RVPTVDVSV         | 9  | 970.54475 | 85.212 | 161820000  |
| 363 | SATRVNLY          | 8  | 922.48723 | 118.89 | 0          |
| 364 | SATRVNLYQNAILSPF  | 16 | 1792.9472 | 155.48 | 238960000  |
| 365 | SATRVNLYQNAILSPY  | 16 | 1808.9421 | 130.44 | 65946000   |
| 366 | SFFDQNGDGIYPW     | 14 | 1657.7413 | 86.898 | 114130000  |
| 367 | SFHRVIPDFM        | 10 | 1247.6121 | 90.601 | 46036000   |
| 368 | SFQPYPEGEDESSLTN  | 16 | 1798.7534 | 57.836 | 392030000  |
| 369 | SFRVPTVDVS        | 10 | 1105.5768 | 73.985 | 2181000000 |
| 370 | SGGQRDLFEGIL      | 12 | 1290.6568 | 83.358 | 84880000   |
| 371 | SGVFTPKF          | 8  | 881.4647  | 66.993 | 1657900000 |
| 372 | SHDVITGR          | 8  | 883.45118 | 151.56 | 77239000   |
| 373 | SHLKDEHQRVH       | 11 | 1384.696  | 117.89 | 506560000  |
| 374 | SHVADRIGYYK       | 11 | 1307.6622 | 164.85 | 528600000  |
| 375 | SILRALPIDVL       | 11 | 1208.7493 | 82.645 | 246450000  |

|     |                  |    |           |        |            |
|-----|------------------|----|-----------|--------|------------|
| 376 | SILRALPIDVLAN    | 13 | 1393.8293 | 108.7  | 459820000  |
| 377 | SILRALPVDVL      | 11 | 1194.7336 | 83.948 | 637980000  |
| 378 | SILRALPVDVLAN    | 13 | 1379.8136 | 82.261 | 233330000  |
| 379 | SIQHELGGFF       | 10 | 1133.5506 | 65.465 | 847740000  |
| 380 | SIQRELGGFF       | 10 | 1152.5928 | 123.35 | 356510000  |
| 381 | SIQRELGGFFGT     | 12 | 1310.6619 | 86.014 | 72352000   |
| 382 | SKNFPTLNLVQM     | 12 | 1390.7279 | 114.5  | 97248000   |
| 383 | SLDNLKIL         | 8  | 914.54368 | 112.37 | 105120000  |
| 384 | SMPRTIDFVADHPF   | 14 | 1631.7766 | 74.53  | 41877000   |
| 385 | SMPRTIDFVADHPFLF | 16 | 1891.9291 | 132.47 | 1647100000 |
| 386 | SPVAAPVFL        | 9  | 899.51165 | 64.523 | 22440000   |
| 387 | SPVAEVPFL        | 9  | 957.51713 | 92.191 | 1647100000 |
| 388 | SPVAEVPFLR       | 10 | 1113.6182 | 183.65 | 6627500000 |
| 389 | SPVAVVPF         | 8  | 814.45889 | 71.359 | 231640000  |
| 390 | SPVAVVPFL        | 9  | 927.54295 | 104.11 | 432490000  |
| 391 | SQKEQRGEIIR      | 11 | 1342.7317 | 80.834 | 84819000   |
| 392 | SQKEQRGEIIRVT    | 13 | 1542.8478 | 84.821 | 1137800000 |
| 393 | SQNDQRGEII       | 10 | 1158.5629 | 102.62 | 1127500000 |
| 394 | SQNDQRGEIIR      | 11 | 1314.664  | 102.06 | 77275000   |
| 395 | SQNDQRGEIIRV     | 12 | 1413.7324 | 93.561 | 46541000   |
| 396 | SQNDQRGEIIRVS    | 13 | 1500.7645 | 176.87 | 930330000  |
| 397 | SQNLKDEHQRVH     | 12 | 1489.7386 | 114.5  | 46653000   |
| 398 | SQSHLKDEHQRVH    | 13 | 1599.7866 | 102.62 | 13972000   |
| 399 | SQTIKDEHQRVQ     | 12 | 1467.743  | 96.342 | 16137000   |
| 400 | SRIDHKFDLM       | 10 | 1260.6285 | 107.69 | 312630000  |
| 401 | SRPDQIGGL        | 9  | 941.49304 | 91.853 | 1671300000 |
| 402 | SSDTIDNVKAK      | 11 | 1176.5986 | 65.156 | 7380800    |
| 403 | SSRQGGLR         | 8  | 859.46241 | 108.09 | 67867000   |
| 404 | SSTPWQSSRQGGLR   | 14 | 1545.7648 | 115.89 | 236900000  |
| 405 | STDKAAGRVPGY     | 12 | 1220.6149 | 85.733 | 214920000  |
| 406 | STDKAAGRVPGYGVLT | 16 | 1590.8366 | 130.77 | 351010000  |
| 407 | STNLDWYKGPTLL    | 13 | 1506.7718 | 87.066 | 457120000  |
| 408 | STPWQSSRQGGLR    | 13 | 1458.7328 | 116.75 | 228690000  |
| 409 | SVMHMIQGRARVQ    | 13 | 1511.7813 | 63.727 | 267760000  |
| 410 | SYPTLPTWRP       | 10 | 1216.6241 | 104.44 | 541750000  |
| 411 | SYPTLPTWRPSL     | 12 | 1416.7402 | 109.29 | 1532700000 |
| 412 | SYPTLPTWRPSLL    | 13 | 1529.8242 | 78.655 | 52944000   |
| 413 | SYTVWPGALPGGGVR  | 15 | 1515.7834 | 123.63 | 70644000   |
| 414 | TAGLIEDVLPQ      | 11 | 1154.6183 | 101.43 | 887720000  |
| 415 | TFDTEGRFMPV      | 11 | 1298.5965 | 74.464 | 58833000   |
| 416 | TGLSYPTLPTWRP    | 13 | 1487.7773 | 145.25 | 44242000   |
| 417 | TGLSYPTLPTWRPS   | 14 | 1574.8093 | 107.06 | 313150000  |
| 418 | TGLSYPTLPTWRPSL  | 15 | 1687.8934 | 105.03 | 126230000  |

|     |                       |    |           |        |             |
|-----|-----------------------|----|-----------|--------|-------------|
| 419 | TIDFVADHPFL           | 11 | 1273.6343 | 75.738 | 247100000   |
| 420 | TIDFVADHPFLF          | 12 | 1420.7027 | 123.16 | 15573000000 |
| 421 | TIDFVADHPFLFL         | 13 | 1533.7868 | 111.06 | 3382300000  |
| 422 | TIKDEHQRVQ            | 10 | 1252.6524 | 118.74 | 130420000   |
| 423 | TLREIWMM              | 8  | 1078.5304 | 77.923 | 312870000   |
| 424 | TNLDWYKGPTLL          | 12 | 1419.7398 | 98.257 | 355220000   |
| 425 | TSMPTIDFVADHPFLF      | 17 | 1992.9768 | 101.56 | 186040000   |
| 426 | TTGGWPTAPDGPY         | 13 | 1318.583  | 59.597 | 174370000   |
| 427 | TTMRDFPITWPW          | 12 | 1549.7388 | 121.8  | 3964400000  |
| 428 | TVFNDILR              | 8  | 976.53418 | 123.69 | 643840000   |
| 429 | TVFNDILRR             | 9  | 1132.6353 | 122.19 | 4447200000  |
| 430 | TVFNDILRRG            | 10 | 1189.6568 | 121.05 | 616950000   |
| 431 | TVFNDILRRGQL          | 12 | 1430.7994 | 70.488 | 41253000    |
| 432 | TVFNDILRRGQLL         | 13 | 1543.8835 | 143.96 | 3409800000  |
| 433 | TVFNDRLRQG            | 10 | 1204.6313 | 90.108 | 713830000   |
| 434 | TVFNDRLRQGQLL         | 13 | 1558.858  | 117.8  | 1072500000  |
| 435 | TVIDAPGHRDFIK         | 13 | 1467.7834 | 149.33 | 371470000   |
| 436 | TVIDAPGHRDFIKN        | 14 | 1581.8263 | 136.94 | 529890000   |
| 437 | TVPVGRVETGVKPG        | 15 | 1507.8722 | 61.235 | 0           |
| 438 | VADHPFLFL             | 9  | 1057.5597 | 72.355 | 370880000   |
| 439 | VADRIGYY              | 8  | 955.47633 | 81.191 | 382220000   |
| 440 | VAPFLRSQ              | 8  | 916.51305 | 94.539 | 234720000   |
| 441 | VAPFLRSQIL            | 10 | 1142.6812 | 62.659 | 408510000   |
| 442 | VDVNNPEGTKGGRH        | 14 | 1478.7226 | 70.977 | 3211700     |
| 443 | VFDVNNNANQLEPRQKEFLLA | 21 | 2458.2605 | 182.02 | 424730000   |
| 444 | VFIPPQLQ              | 8  | 940.5382  | 138.38 | 28108000000 |
| 445 | VFIPPQLQQ             | 9  | 1068.5968 | 95.793 | 5457300000  |
| 446 | VFNDILRR              | 8  | 1031.5876 | 79.116 | 224100000   |
| 447 | VFNDILRRG             | 9  | 1088.6091 | 66.621 | 64355000    |
| 448 | VFNDILRRGQLL          | 12 | 1442.8358 | 116.12 | 1197000000  |
| 449 | VFNDRLRQGQLL          | 12 | 1457.8103 | 119.75 | 232150000   |
| 450 | VFNQPMQ               | 8  | 990.4593  | 68.485 | 81310000    |
| 451 | VFNQPQQQ              | 8  | 987.47739 | 74.717 | 135640000   |
| 452 | VIDAPGHR              | 8  | 863.46135 | 124.37 | 0           |
| 453 | VIDAPGHRDFIK          | 12 | 1366.7357 | 140.78 | 363670000   |
| 454 | VIDAPGHRDFIKN         | 13 | 1480.7787 | 104.82 | 397640000   |
| 455 | VIGSPLVELLR           | 11 | 1194.7336 | 72.434 | 73541000    |
| 456 | VIISAPSKDAPMFVM       | 15 | 1604.8306 | 65.933 | 242000000   |
| 457 | VINDKFGIVEGL          | 12 | 1302.7184 | 71.614 | 46547000    |
| 458 | VIRRVIEPQ             | 9  | 1108.6717 | 127.12 | 4978100000  |
| 459 | VNLIPFRLH             | 10 | 1204.7081 | 64.485 | 95933000    |
| 460 | VPFLRSQILRQ           | 11 | 1355.8038 | 61.344 | 57285000    |
| 461 | VQKFIPELIGK           | 11 | 1270.7649 | 82.914 | 80161000    |



|     |                              |    |           |        |            |
|-----|------------------------------|----|-----------|--------|------------|
| 462 | VREQYMK                      | 8  | 1051.5485 | 121.99 | 302480000  |
| 463 | VSQQGPVEHQ                   | 10 | 1107.5309 | 63.419 | 4084200    |
| 464 | VVAPPERKYSVW                 | 12 | 1429.7718 | 90.696 | 69401000   |
| 465 | VVISAPSKDAPMF                | 13 | 1360.7061 | 70.056 | 70864000   |
| 466 | VVLYPSPGMGHL                 | 12 | 1268.6587 | 116.54 | 202390000  |
| 467 | VVNNHGQTVF                   | 10 | 1113.5567 | 70.69  | 181230000  |
| 468 | VVNNHGQTVFNDILRRGQLL         | 20 | 2292.2451 | 229.97 | 2894100000 |
| 469 | VVNNHGQTVFNDILRRGQLLIIP<br>Q | 24 | 2743.5246 | 79.69  | 71855000   |
| 470 | VVNNNGQTVFNDILRR             | 16 | 1857.9809 | 112.72 | 62939000   |
| 471 | VVNNNGQTVFNDILRRGQLL         | 20 | 2269.2291 | 258.23 | 4093900000 |
| 472 | VVNNNGQTVFNDILRRGQLLIV<br>PQ | 24 | 2706.4929 | 110.38 | 521790000  |
| 473 | VVNNNGQTVFNDRLRQG            | 17 | 1929.9769 | 93.51  | 60871000   |
| 474 | VVNNNGQTVFNDRLRQGQLL         | 20 | 2284.2036 | 188.55 | 227420000  |
| 475 | VVNNNGQTVFNDRLRQGQLLI<br>VPQ | 24 | 2721.4674 | 229.23 | 840230000  |
| 476 | VWPGALPGGGVR                 | 12 | 1164.6404 | 63.419 | 34743000   |
| 477 | VYQPIQTQ                     | 8  | 975.50255 | 49.358 | 798360000  |
| 478 | WALQRGTSVIPK                 | 12 | 1354.7721 | 79.489 | 47737000   |
| 479 | WNINAHSVVYMIQ                | 13 | 1573.7711 | 125.97 | 42379000   |
| 480 | YDPSEYQPYPEQQEPF             | 17 | 2143.9011 | 67.08  | 840310000  |
| 481 | YDPSEYQPYPEQQEPFVQ           | 19 | 2371.0281 | 82.85  | 1596300000 |
| 482 | YDPSEYQPYPEQQPF              | 16 | 2014.8585 | 57.39  | 177310000  |
| 483 | YFDEQNEQLR                   | 10 | 1340.5997 | 138.1  | 61157000   |
| 484 | YFGRGPIQIS                   | 10 | 1136.5978 | 79.809 | 4037600000 |
| 485 | YFGRGPIQISY                  | 11 | 1299.6612 | 75.043 | 0          |
| 486 | YHNAPALVYIL                  | 11 | 1272.6867 | 86.794 | 109490000  |
| 487 | YHNAPGLV                     | 8  | 869.43955 | 80.377 | 1567600000 |
| 488 | YHNAPGLVYLL                  | 11 | 1258.671  | 92.187 | 1354200000 |
| 489 | YIDRIHKA                     | 8  | 1014.5611 | 77.923 | 34070000   |
| 490 | YNPSEYQPYPE                  | 12 | 1513.6361 | 72.638 | 175420000  |
| 491 | YNPSEYQPYPEQQEPFVQ           | 19 | 2370.0441 | 73.881 | 3028000000 |
| 492 | YQPYPEQQQPILQQ               | 14 | 1758.8577 | 57.204 | 96959000   |
